1 **Title**

2 Extraintestinal pathogenic (ExPEC) lineages explain prolonged carriage of travel-acquired  
3 extended-spectrum  $\beta$ -lactamase-producing *Escherichia coli*

4

5 **Author list**

6 Boas C.L. van der Putten<sup>1,2\*</sup>, Jarne M. van Hattem<sup>1</sup>, John Penders<sup>3,4</sup>, COMBAT Consortium<sup>#</sup>,  
7 Daniel R. Mende<sup>1</sup>, Constance Schultsz<sup>1,2</sup>

8 <sup>1</sup>Department of Medical Microbiology, Amsterdam UMC, University of Amsterdam, the  
9 Netherlands

10 <sup>2</sup>Department of Global Health, Amsterdam Institute for Global Health and Development,  
11 Amsterdam UMC, University of Amsterdam, the Netherlands

12 <sup>3</sup>School for Public Health and Primary Care (Caphri), Department of Medical Microbiology,  
13 Maastricht University Medical Centre, Maastricht, Netherlands

14 <sup>4</sup>School for Nutrition and Translational Research in Metabolism (NUTRIM), Maastricht University  
15 Medical Centre, Maastricht, Netherlands

16 \*Corresponding author. Email: [boas.vanderputten@amsterdamumc.nl](mailto:boas.vanderputten@amsterdamumc.nl). Telephone:  
17 +31205664868.

18 <sup>#</sup>Members are listed in the appendixes

## 19 Abstract

20 Fecally carried extended-spectrum  $\beta$ -lactamase (ESBL)-producing *Escherichia coli* (ESBL-Ec) are  
21 frequently acquired during international travel, contributing to global spread of AMR. However,  
22 determinants of long-term carriage of travel-acquired ESBL-Ec are unknown.

23 From a prospective cohort study of 2001 international travelers, we selected all 28 who  
24 acquired ESBL-Ec during travel and subsequently carried ESBL-Ec for at least 12 months after  
25 return. We sequenced a total of 155 ESBL-Ec isolates from these long-term carriers and 54 age-,  
26 sex- and destination-matched short-term carriers (<1 month carriage). We confirmed  
27 persistence of ESBL-Ec in long-term carriers using SNP typing and compared ESBL-Ec from long-  
28 term and short-term carriers using in silico multi-locus sequence and phylogroup typing. We  
29 employed long-read sequencing to investigate ESBL plasmid dissemination.

30 We show that extraintestinal pathogenic (ExPEC) lineages of *Escherichia coli* are significantly  
31 more likely to persist in healthy travelers than other *E. coli* lineages, in the absence of antibiotic  
32 usage, mainly driven by sequence type (ST) 131 and phylogroup D *E. coli*. Additionally, we  
33 identified two epidemiologically unrelated clonal lineages of ST38 carrying a range of ESBL- and  
34 carbapenemase-encoding genes. Using public datasets, we demonstrate the recent parallel  
35 emergence of these lineages and their subsequent rapid global dissemination, which has major  
36 implications for epidemiological tracking of ST38 strains.

37 Our findings show that persistence of travel-acquired ESBL-Ec is mediated by a limited number  
38 of ExPEC lineages. These findings support recent insights suggesting ExPEC lineages have not  
39 necessarily evolved towards virulence, but rather towards efficient intestinal colonization.

## 40 Importance

41 In 2018, an estimated 1.4 billion international trips were undertaken according to the World  
42 Tourism Organization. Antibiotic resistant *Escherichia coli* are frequently acquired during travel  
43 due to contact with contaminated foodstuff, or fecal-oral, environmental and human-to-human  
44 transmission. Resistant *E. coli* that can persist in the travelers' gut for long periods of time after  
45 return from travel, are likely to contribute to further transmission. Using highly detailed  
46 genomic typing of resistant *E. coli*, isolated from a large prospective cohort of international  
47 travelers, we identified bacterial characteristics explaining long-term carriage. Our results  
48 provide important information that can be used to estimate the risk of long-term carriage when  
49 travelers return with acquired resistant *E. coli*.

50

51

## 52 Introduction

53 International travel contributes significantly to the spread of extended-spectrum  $\beta$ -lactamase  
54 (ESBL) gene positive *Escherichia coli* (ESBL-Ec).<sup>1,2</sup> ESBL-Ec are acquired often during international  
55 travel and typing have shown these ESBL-Ec to be genetically diverse.<sup>3-5</sup> Travel-acquired ESBL-Ec  
56 are generally quickly lost within the first month after return from travel, although studies show  
57 a fraction of travelers stay positive for ESBL genes long after return.<sup>1,3-6</sup>

58 Studying these long-term carriers of travel-acquired ESBL-Ec has proven challenging, mainly for  
59 two reasons. First, inclusion of a large number of travelers is needed to find enough long-term  
60 carriers. Secondly, without costly high-resolution typing methods, such as whole-genome  
61 sequencing (WGS), it becomes nearly impossible to reliably differentiate between persistence of

62 a travel-acquired strain and re-acquisition of a highly similar strain. One study employed WGS to  
63 investigate persistence in 16 travelers who acquired ESBL-Ec abroad and showed that only one  
64 traveler carried a travel-acquired strain for at least 7 months.<sup>6</sup> Due to the low sample size, no  
65 ESBL-Ec attributes could be identified that were associated with long-term carriage. Given that a  
66 relatively small fraction of travel-acquired strains persists for more than 6 months after return,<sup>1</sup>  
67 a sufficiently large number of included travelers is needed to investigate long-term carriage in  
68 detail.

69 The COMBAT study represents the largest longitudinal study exploring the acquisition of ESBL-  
70 positive Enterobacteriaceae (ESBL-E) during international travel to date, including 2001 Dutch  
71 travellers.<sup>1</sup> Out of 1847 travelers who were ESBL-E negative before travel, 633 travelers (34.3%)  
72 acquired ESBL-E abroad, of whom 38 travelers (6.0%) were colonized for  $\geq 12$  months after ESBL-  
73 E acquisition, based on ESBL gene typing. Persistence of ESBL-E was linked to *E. coli* carrying  
74 CTX-M group 9 ESBL genes.<sup>1</sup> However, WGS analysis was not performed in the early phase of  
75 the COMBAT study and hence, persistent colonization of ESBL-producing bacteria could not be  
76 demonstrated.

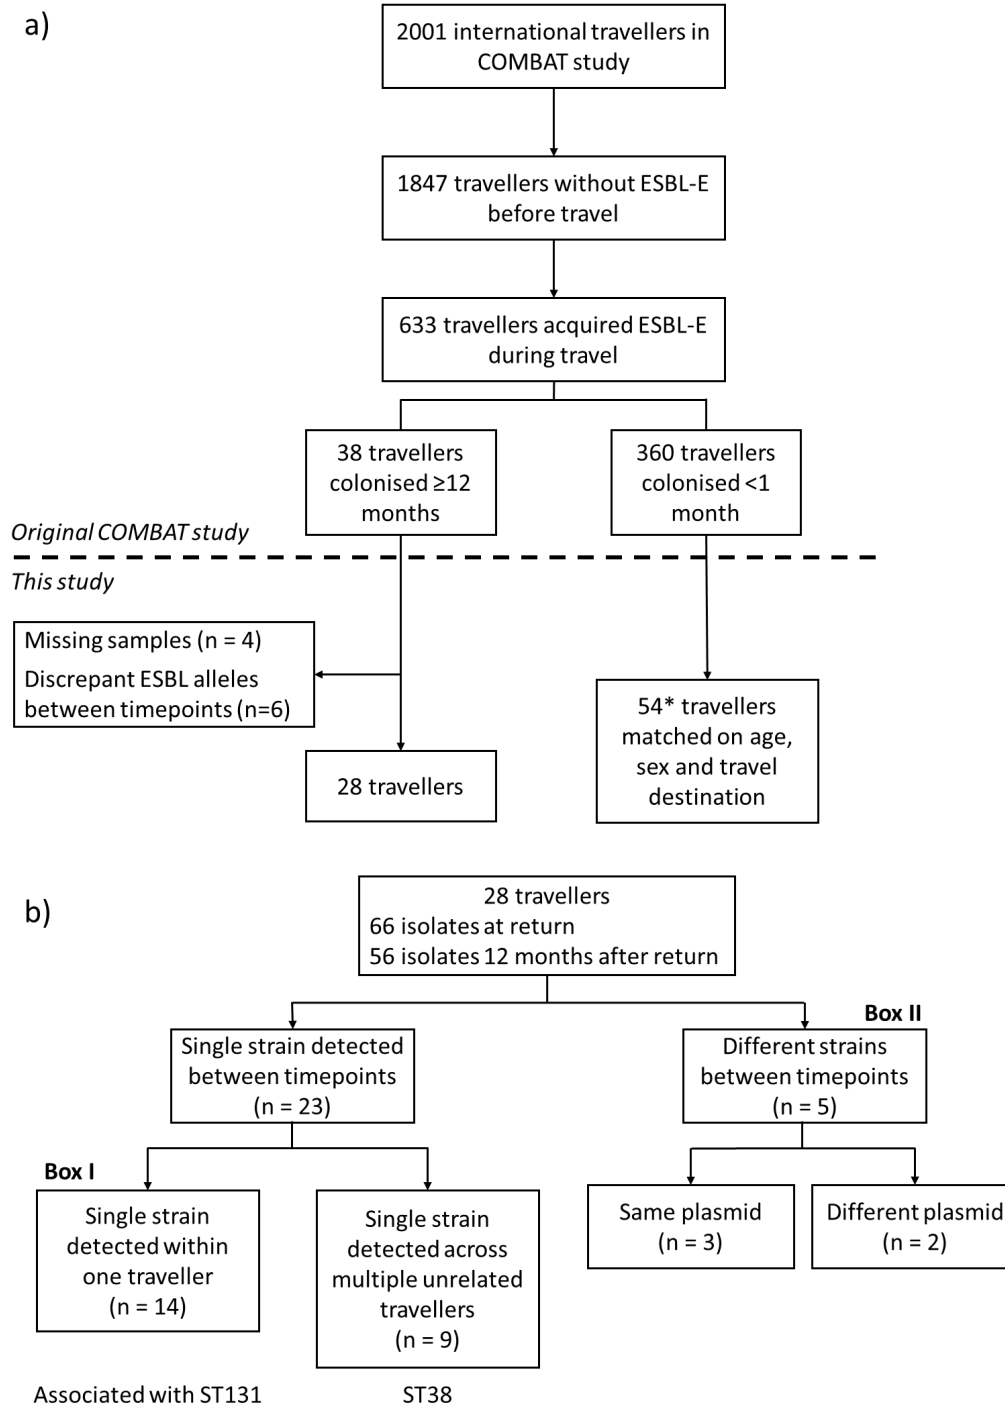

77

78 **Figure 1. Study design a)** Sampling flowchart. \*Long-term carriers were matched by age, sex,  
 79 and travel destination in a 1:2 ratio. For two long-term carriers only one matching short-term  
 80 carrier could be identified. ESBL-E: extended-spectrum  $\beta$ -lactamase-producing

81 Enterobacteriaceae. **b)** Flowchart depicting the identification of persistent strains and plasmids.  
82 Clonal isolates representing a single strain were defined as isolates fewer than 17 SNPs/Mbp  
83 alignment apart. Persistent plasmids were defined as sharing >75% of open reading frames with  
84 >99% nucleotide identity. Nine epidemiologically unrelated travelers harbored isolates which  
85 were considered identical and shared between travelers, all of which belonged to ST38.

86

## 87 Results

88 From 2001 Dutch international travelers in the COMBAT study, we included all 38 travelers who  
89 acquired ESBL-E abroad and carried ESBL-E for at least 12 months after return.<sup>1</sup> Four travelers  
90 were excluded due to missing samples and six travelers were excluded as preliminary WGS  
91 analyses indicated they carried ESBL-Ec with different ESBL gene alleles between timepoints  
92 (Fig. 1a). These discrepant ESBL alleles between timepoints were not identified in the original  
93 COMBAT study since ESBL typing was performed at ESBL group level using microarrays.<sup>1</sup>  
94 These 28 long-term carriers were matched by age, sex, and travel destination with travelers  
95 who carried travel-acquired ESBL-Ec for less than one month after return. From these, we  
96 randomly selected two short-term carriers per long-term carrier (Fig. 1a). For two long-term  
97 carriers, only one matching short-term carrier could be identified yielding 54 short-term  
98 carriers.  
99 We performed Illumina WGS on all ESBL-Ec isolates sampled from these travelers on return  
100 from travel and 12 months thereafter (long-term carriers only). From the 28 long-term carriers,  
101 the final dataset consisted of 66 morphologically different ESBL-Ec strains that were isolated at

102 return from travel, and 56 ESBL-Ec that were isolated 12 months after return. Additionally, 67  
103 isolates were available from the 54 matched short-term carriers (Fig. 1b).  
104 Antibiotic usage was low before, during, and after travel and similar between long-term and  
105 short-term carriers (Table S1). No travelers were admitted to the hospital during travel in either  
106 group. International travel within 12 months after return from index travel was common for  
107 both groups. However, only 2 out of 28 long-term carriers (and 3 out of 54 short-term carriers)  
108 visited the same country as they visited during index travel, indicating reacquisition of the same  
109 strain from the same source was very unlikely.

110

#### 111 Determination of clonality by SNP comparison between bacterial whole genome sequences

112 We determined the clonality of isolate pairs based on single nucleotide polymorphism (SNP)  
113 distances, by performing an all-versus-all comparison between all isolates in our dataset. All  
114 isolate pairs were compared to each other independent of their origin i.e. whether obtained  
115 from a single traveler or from unrelated travelers.

116 SNP distances are a commonly used measure to assess whether a strain has persisted for a  
117 certain period of time. In detail, the core genomes are aligned and the number of SNPs between  
118 the two isolates calculated.<sup>32</sup> Typically, a threshold of 5-10 SNPs has been used for *E. coli*.<sup>6,33</sup>  
119 However, the use of this global threshold suffers from two drawbacks. The first is that strains  
120 accumulate (point) mutations over time. The 5-10 SNP threshold is applied in situations where  
121 the sampling periods are much shorter than the 12 months representing our sampling  
122 period<sup>6,33,34</sup> necessitating the definition of a threshold optimized for a 12-month time frame.

123 Secondly, the aligned portions of the genomes can differ greatly between pairs of isolates due  
124 to the genomic differences between compared strains. In our dataset, the aligned fragments of  
125 genomes vary between 0.5 Mbp to 4.0 Mbp. Therefore, we decided to normalize for the  
126 number of aligned bases, and thus express differences between isolates as SNPs/aligned Mbp  
127 instead of absolute number of SNPs. A similar approach has been used for *Escherichia coli*<sup>35</sup> and  
128 for *Klebsiella pneumoniae*<sup>36</sup> isolates. SNP distances between isolates are provided in the  
129 appendixes (Table S2).

130 By identifying isolate pairs from unrelated travelers that were very few SNPs apart, we can also  
131 identify clonal lineages that are shared by multiple travelers from different households. Using  
132 our approach, we identified two clonal lineages of ST38 that appeared in nine unrelated  
133 travelers in our study, and also in recent external datasets from Europe, North America, South  
134 America, Oceania, and Asia.<sup>37-55</sup> These isolates harbored identical ESBL alleles and were found  
135 to be highly similar (3-16 SNPs/Mbp), even when comparing isolates from unrelated travelers  
136 who travelled to different countries or continents. Hence, for ST38, we cannot determine  
137 whether strains have persisted within a traveler, or whether different strains from the same  
138 ST38 lineage were lost and subsequently acquired. Possibly, to determine epidemiological  
139 relatedness, SNP typing of ST38 should be combined with accessory genome typing, for example  
140 by measuring differences between isolates in number of genes presence (Table S3 and Figure  
141 S1). Here we observed that for five out nine travelers, isolate pairs from the same traveler were  
142 more similar to each other than to any other isolate, including external datasets, which suggests  
143 persistence of a single strain. Even though our results suggest that accessory genome typing can



144 support strain typing, our inability to confidently determine persistence for the ST38 isolates  
145 made us exclude these from further persistence analysis.  
146 Excluding the 9 travelers with ST38, 19 out of the 28 travelers remained and together  
147 contributed 96 isolates, of which 50 isolates were cultured at return from travel and 46 isolates  
148 12 months after return (Box I and II in Figure 1b). In this data set, a SNP threshold of 17 SNPs per  
149 1,000,000 aligned bases was found to be optimal to establish clonality between isolates from a  
150 single strain based on F1 score (see Methods). We performed the SNP calling analysis with three  
151 reference genomes belonging to ST10, ST73, and ST95 and obtained similar results (Table S4).

152

153 ESBL gene persistence is predominantly mediated by persistence of bacterial strains

154 Fourteen out of the nineteen travelers harbored pairs of ESBL-Ec isolates that were  $\leq 17$   
155 SNPs/Mbp apart over the course of 12 months, indicating that the travel-acquired strain  
156 persisted after return (Figure 1). For the remaining five travelers (Box II in Figure 1b), pairs of *E.*  
157 *coli* isolates were not related, indicating loss of the travel-acquired strain. For one of these  
158 travelers the isolates were 84.4 SNPs/Mbp apart, while for the four other travelers all isolates  
159 were more than 900 SNPs/Mbp apart. The isolate pair which was 84.4 SNPs/Mbp apart  
160 belonged to a single ST, which means these isolates would not have been distinguished had we  
161 employed only MLST.

162 To approximate the diversity of ESBL-Ec present in the intestine from the five travelers who did  
163 not harbor persistent strains, additional ESBL-Ec were isolated from stored fecal samples and  
164 whole-genome sequenced (Illumina). Based on previous studies,<sup>6</sup> we chose to aim for a total of

165 five ESBL-Ec isolates per traveler per time point. This additional sequencing reinforced our  
166 earlier hypothesis that these five travelers did not harbor any persistent strains, but carried  
167 identical ESBL genes between timepoints.

168 To determine why five travelers lacking persistent ESBL-Ec strains harbored presumably  
169 persistent, travel-acquired ESBL genes we concentrated on ESBL-gene carrying plasmids, which  
170 could potentially be transferred between bacterial hosts. Their persistence was studied using  
171 Oxford Nanopore Technologies sequencing of one ESBL-Ec isolate per traveler per time point as  
172 this technology is able to resolve plasmid structures.

173 For two out of five travelers, we found significant similarity between the ESBL plasmids, while  
174 the *E. coli* strains harboring these plasmids were shown to be unrelated. The plasmids shared  
175 >75% of predicted genes with an average nucleotide identity (ANI) of 99.8% (Figure S2 and Table  
176 S5). These results indicate transfer and persistence of the ESBL plasmid in different bacterial  
177 strains over the course of 12 months.

178 For three remaining travelers, ESBL-Ec strains and plasmids were different between time points,  
179 while the ESBL genes were identical. The mobile elements adjacent to the ESBL genes were also  
180 different between plasmids, suggesting a very low probability of the resistance gene being  
181 transferred between plasmids through other mobile genetic elements such as transposons  
182 (Figure S2).

183 Taken together, our results indicate that persistence of ESBL-Ec is more commonly explained by  
184 persistence of strains (fourteen travelers) than persistence of the ESBL plasmid only (two  
185 travelers). For three travelers, we found that both strain and plasmid did not persist. Most

186 likely, these travelers re-acquired different strains with the same resistance allele on different  
187 plasmids.

188

189 Phylogroup D and ST131 are associated with persistence

190 Next, we compared strains from 14 long-term carriers ( $\geq 12$  months carriage of a single travel-  
191 acquired strain, Box I in Fig 1b) with those of 27 age, sex, and travel destination matched short-  
192 term carriers ( $< 1$  month carriage), to assess if there is a bacterial genetic basis for long-term  
193 carriage. As described above, we matched each long-term carrier to two short-term carriers, yet  
194 for one of the long-term carriers only one matching short-term carrier was available.

195 ST131 (in particular clade C of ST131) was overrepresented in the group of persisting strains.

196 ST131 strains persisted in 4 (28.6%) out of 14 long-term carriers and were absent from 27

197 matched short-term carriers (p-value Fisher's exact test: 0.0099). We note that in earlier smaller  
198 studies, acquisition of ST131 *E. coli* during travel was absent<sup>5</sup> or rare.<sup>4,6</sup> We also detected strains

199 which belonged to phylogroup B2, similar to ST131, in short-term carriers but these strains were

200 of different sequence types and clonal complexes (ST1193 twice and ST2346 once). Phylogroup

201 D strains also appeared overrepresented, but this did not reach statistical significance (Figure

202 2a). Phylogroup D strains (ST69, n = 2; ST393, n = 2; ST405, n = 2; and ST449 n = 1) persisted in 7

203 (50%) out of 14 long-term carriers, and were found in 5 (18.5%) out of 27 short-term carriers (p-

204 value Fisher's exact test: 0.068). When 5 travelers harboring ST38 (also part of phylogroup D),

205 which might be persistent based on the accessory gene analysis, were included in the analysis

206 together with their matched controls, the association with phylogroup D was even stronger

207 (Figure S3, Fisher's exact test p-value: 0.00099). If we adhere to the definition of extraintestinal  
208 pathogenic *E. coli* (ExPEC) lineages from a systematic review,<sup>56</sup> we find a strong association  
209 between ExPEC carriage and long-term ESBL carriage (Figure 2b, Fisher's exact test p-value:  
210 0.00029).

211 Based on these results, we conclude there is a bacterial genetic basis for long-term carriage. The  
212 short-term carriers acquired genetically diverse ESBL-Ec, as reported in earlier studies,<sup>4-6</sup> whilst  
213 only a subset of ESBL-Ec lineages was observed that was shown to efficiently persist.

214 The bacterial lineages we found to be linked to persistence (ST131 and phylogroup D) have been  
215 described to harbor ESBL genes and cause extraintestinal disease frequently, in particular the  
216 pandemic and extraintestinal pathogenic ST131 lineage.<sup>57,58</sup> Several studies have suggested that  
217 ST131 is a successful colonizer of the human gut, besides being a pathogenic clade.<sup>59-61</sup> Our  
218 study shows that ST131 is frequently acquired by healthy travelers and is able to persist for  
219 more than a year after acquisition abroad in this population, independent of antibiotic usage.

220 From phylogroup D, we found sequence types 69, 393, 405, and 449 to be persistent in our  
221 collection. ST449 belongs to clonal complex 31, as does ST393. ST69, ST393, and ST405 are  
222 generally regarded as high-risk clones, not only due to their acquired ESBL resistance genes but  
223 also their capability to cause extraintestinal disease.<sup>56,62-64</sup> Due to the clonality of ST38 in our  
224 dataset, we cannot definitively assess whether strains of this sequence type have persisted. If  
225 some of these strains have actually persisted, as suggested by results of the accessory genome  
226 analysis, this will add to the population of phylogroup D strains that are capable of persisting  
227 after acquisition abroad.

228

229

230

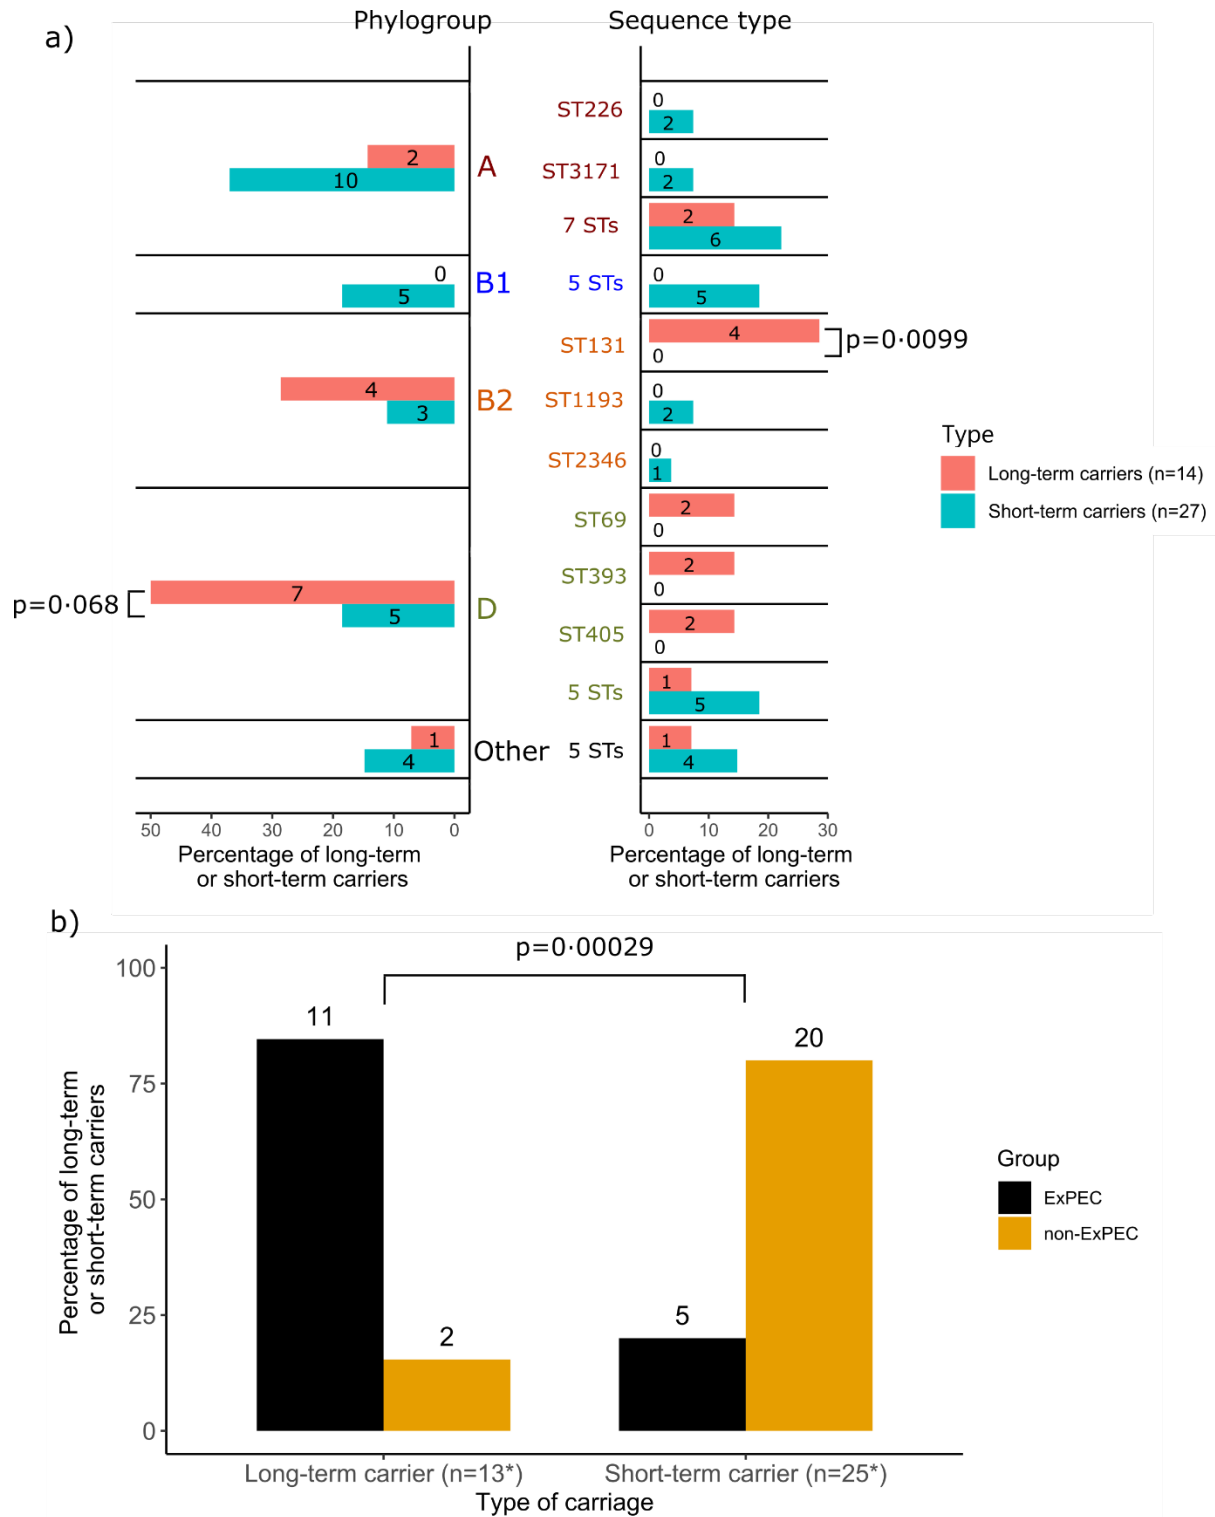

231  
 232 **Figure 2. a)** Bar plots of phylogroup and sequence types of isolates that persisted in long-term  
 233 carriers or were isolated from matched short-term carriers. Bar lengths indicate the percentage

234 of long-term carriers (N=14) or short-term carriers (N=27) that carried that particular  
235 phylogroup/sequence type. Bar numbers indicate the absolute number of strains.  
236 Corresponding colors indicate which sequence types belong to which phylogroups.  
237 **b)** Association between ExPEC status and term of carriage. \*The persistent isolate of one long-  
238 term carrier could not be assigned to a sequence type, and thus not to an ExPEC sequence type.  
239 This single long-term carrier and its two matched short-term carriers were thus excluded from  
240 this analysis.

#### 241 Intercontinental dissemination of clonal ST38 lineages

242 Given the global dissemination of two clonal lineages of ESBL-positive ST38 as observed in our  
243 study, we further analyzed the ST38 population structure including isolates prevalent in public  
244 data. We downloaded all 1784 *E. coli* genomes from Enterobase  
245 (<https://enterobase.warwick.ac.uk>)<sup>65</sup> belonging to clonal complex 38 (CC38), isolated from 1979  
246 onwards. ST38 comprises approximately 75% of the isolates in CC38, although other abundant  
247 STs are also present (e.g. ST963). We constructed a core genome phylogeny from these publicly  
248 available strains and our 21 ST38 strains and determined clusters within the population. This  
249 revealed the presence of several clonal expansions within CC38, two of which corresponding to  
250 the clonal lineages from our collection (clusters 1 and 6 in figure 3). These two lineages are  
251 represented by 78 (cluster 1) and 111 (cluster 6) genomes which within their respective clusters  
252 are separated by a median of 15.7 (range: 0-377) and 13.5 SNPs (range: 0-97) per Mbp  
253 alignment, respectively (Figure 4). Strains from both lineages have spread globally, and have  
254 been isolated on all continents except Africa and Antarctica.<sup>37-55</sup> Within clusters 1 and 6, 74 and  
255 107 isolates share fewer than 17 SNPs/Mbp with another isolate in a core gene alignment,

256 respectively, similar to our findings. Strains from both clusters have been isolated from healthy  
257 individuals, as well as patients diagnosed with urinary tract infection or bacteremia. All isolates  
258 from the two clonal lineages were isolated recently (2012-now) while none of the 111 CC38  
259 isolates sampled before 2012 belonged to these lineages. This might indicate that both lineages  
260 have emerged recently. ST38 is capable of acquiring different ESBL genes, illustrated by the fact  
261 that 64% of CC38 strains in Enterobase harbor various *bla*<sub>CTX-M</sub> genes. Additionally, CC38 is able  
262 to acquire and harbor carbapenemase genes such as *bla*<sub>OXA-48</sub> or *bla*<sub>OXA-244</sub> conferring resistance  
263 to last resort antimicrobials carbapenems.<sup>66,67</sup> Taken together, these findings highlight the  
264 recent parallel emergence and intercontinental spread of antimicrobial drug resistant ST38  
265 clones.

266



Tree scale: 0.001

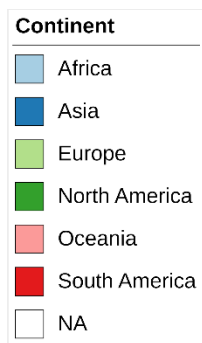

fastBAPS cluster 6

fastBAPS cluster 1

267

268 **Figure 3.** Core genome phylogeny of 1805 clonal complex 38 *E. coli* strains. Outer ring indicates

269 continent on which the strain was isolated. The two clonal ST38 lineages present in the COMBAT

270 collection are marked in red and blue. Tree and metadata available through iTOL:<sup>68</sup>

271 <https://itol.embl.de/tree/2131278347268071589210657>.

272

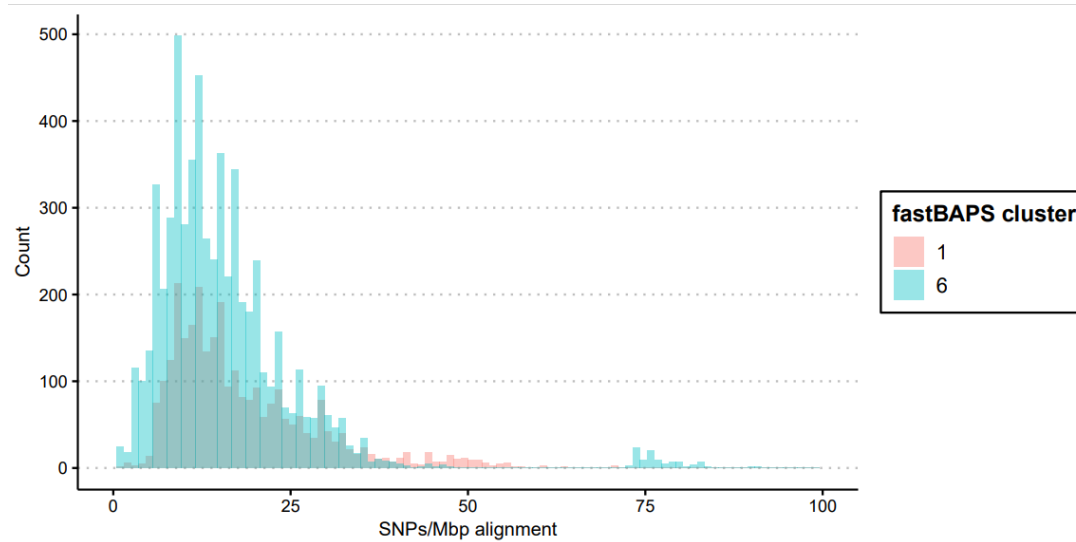

273  
274 **Figure 4.** SNP histogram of 189 publicly available strains from two clonal ST38 lineages  
275 (fastBAPS clusters 1 and 6). The SNP threshold used in the main analysis to differentiate strains  
276 was 17 SNPs/Mbp alignment.

277

278 **Discussion**

279 Studying long-term carriage of travel-acquired ESBL-Ec necessitates large traveler cohorts and  
280 high-resolution typing methods. Previous work could not make strong assertions about the  
281 persistence of strains, either due to the number of included travelers or the typing methods  
282 employed.<sup>3-6</sup> By employing WGS to analyze strains isolated in a large traveler cohort, we were  
283 able to address most of the issues regarding sample size and typing methods. However, even  
284 with WGS data available, not all strains could be discerned with certainty. Two clonal ST38  
285 lineages were present in our collection, and strains from these two lineages could not be  
286 reliably differentiated due to the within-lineage genetic similarity.

287 Our approach can be extended to other bacterial species, or other types of antimicrobial  
288 resistance. In the primary COMBAT study, 100 non-*E. coli* isolates were isolated from travelers  
289 who acquired ESBL genes abroad<sup>1</sup>. Similarly, other studies investigating ESBL gene acquisition  
290 have found ESBL-positive *E. coli* at high rates, but also non-*E. coli* species carrying ESBL genes  
291 after travel. Additionally, resistance genes other than ESBL genes can be investigated using our  
292 approach and software. Of heightened interest for such analyses are the emerging resistances  
293 against carbapenems (e.g. *bla*<sub>NDM</sub>, *bla*<sub>KPC</sub> or *bla*<sub>OXA</sub> genes) or colistin (*mcr* genes).

294 In conclusion, we found that specific bacterial lineages are associated with long-term carriage of  
295 ESBL-Ec. Many of these lineages generally are regarded as ExPEC (ST131, ST393, ST405, and  
296 ST69).<sup>56</sup> Since the likelihood of onward transmission of travel-acquired ESBL-E depends on  
297 carriage duration after return, these persistent lineages may be more likely to be transmitted  
298 and cause infection. Additionally, we detected ST38 lineages that are abundant in public data  
299 and have recently spread across continents with little genetic differences. Our findings  
300 emphasize the risk of AMR transmission through travel, and provide information about which *E.*  
301 *coli* lineages in particular require our attention from both a public health and clinical medicine  
302 perspective.

303

## 304 **Materials and methods**

305 We included all 38 travelers from the COMBAT cohort who were colonized for  $\geq 12$  months with  
306 Enterobacteriaceae positive for the same ESBL gene group (microarray) at return from travel  
307 and at all subsequent time points (1, 3, 6, and 12 months after return from travel).<sup>1</sup> Whole-  
308 genome sequencing (Illumina HiSeq 2500) was performed on all ESBL-Ec strains available from

309 samples isolated at return from travel and 12 months after return from travel. Inclusion and  
310 exclusion are summarized in Figure 1. DNA extraction and library preparation were performed  
311 using the Qiagen Blood and Tissue DNA extraction kit and Kapa HTP library prep kit,  
312 respectively.

313 122 strains from 28 long-term colonized travelers were included, with 66 strains isolated at  
314 return from travel and 56 strains isolated 12 months after return. The strains were analyzed  
315 using a Snakemake v5.7.1<sup>7</sup> pipeline, available at <https://github.com/boasvdp/COMBAT>. In  
316 short, Illumina sequencing data was trimmed using fastp v0.20.0,<sup>8</sup> assembled using the Shovill  
317 wrapper v1.0.9 (<https://github.com/tseemann/shovill>) for SPAdes,<sup>9</sup> and resistance genes were  
318 identified using AMRfinderplus v3.2.3.<sup>10</sup> *E. coli* phylogroups were predicted using EzClermont  
319 v0.4.3.<sup>11</sup> A core genome alignment of all strains from long-term carriers was made by mapping  
320 onto a common reference genome (*E. coli* ATCC 25922, Genbank: CP009072) using Snippy v4.4.5  
321 (<https://github.com/tseemann/snippy>). SNP analysis was repeated with two different reference  
322 genomes (*E. coli* K-12 MG1655 and DSM 30083<sup>T</sup>, Genbank: NC\_000913, and NZ\_CP033092,  
323 respectively). IQtree v1.6.12<sup>12</sup> was used to infer a phylogeny under a transversion model with  
324 equal base frequencies and a FreeRate model with 3 categories, as advised by Modelfinder<sup>13</sup>  
325 from the core genome alignment, using a count of constant sites from snp-sites v2.5.1.<sup>14</sup>  
326 Recombination events in the core genome alignment were identified using ClonalFrameML  
327 v1.12<sup>15</sup> and masked using maskrc-svg v0.5 (<https://github.com/kwongj/maskrc-svg>). SNP  
328 comparisons were made using snp-dists v0.7.0 (<https://github.com/tseemann/snp-dists>) and a  
329 modified version of snp-dists v0.7.0 which calculates alignment lengths  
330 (<https://github.com/boasvdp/snp-dists>). Comparisons were expressed as SNPs/Mbp alignment

331 between pairs. F1 score was calculated for SNP thresholds ranging from 1 to 1000 SNPs/Mbp by  
332 taking the harmonic mean of precision and recall. As there are no reference tests available  
333 against which our approach can be benchmarked, we calculated recall as the number of  
334 travelers in whom we were able to identify isolate pairs which were fewer SNPs/Mbp apart than  
335 the threshold, divided by the total of 19 travelers. False positives were defined as travelers from  
336 different households who carried isolate pairs between them that shared fewer SNPs/Mbp than  
337 the tested threshold. Data were plotted using ggplot2 v3.1.1,<sup>16</sup> ggthemes v2.4.0,<sup>17</sup> and  
338 patchwork<sup>18</sup> in R v3.5.1.<sup>19</sup> Tabular data was analyzed using Pandas v0.24.2<sup>20</sup> in Python v3.6.7.<sup>21</sup>

339 For the accessory genome typing of ST38, all 189 genomes from this study and Enterobase  
340 which are part of fastBAPS clusters 1 and 6 of CC38 as defined in this study were included. A  
341 pangenome was constructed using Roary v3.13.0<sup>22</sup> and differences in gene presence between  
342 genomes were calculated using snp-dists (<https://github.com/tseemann/snp-dists>). We  
343 quantified the differences between COMBAT genomes isolated from the same traveler, but at  
344 different timepoints. We also quantified differences with any other genome (COMBAT and  
345 Enterobase data).

346 Next, 54 travelers who were colonized for <1 month were matched using SPSS 26 by age (range  
347 +/- 7 years), sex, and travel destination (United Nations subregions) to 28 long-term carriers  
348 (Fig. 1a). After SNP analysis and exclusion of travelers carrying ST38, 14 long-term carriers  
349 remained together with their 27 matched short-term carriers. Illumina WGS was performed as  
350 described before on all ESBL-Ec strains isolated at return from travel from the remaining short-  
351 term carriers (33 strains, median 1 strain per traveler).

352 To determine why five travelers lacking persistent ESBL-Ec strains harbored presumably  
353 persistent, travel-acquired ESBL genes, we concentrated on ESBL-gene carrying plasmids, which  
354 could potentially be transferred between bacterial hosts. We generated Oxford Nanopore  
355 Technologies sequencing data for 10 strains from these 5 travelers according to Van der Putten  
356 et al. (2020)<sup>23</sup>. In short, strains were grown overnight at 37 °C in liquid LB. DNA extraction and  
357 library preparation were performed using the Qiagen MagAttract HMW DNA Kit (Cat. No.  
358 67563) and ONT native barcoding kit (Cat. No. EXP-NBD114), respectively. The library was  
359 subsequently sequenced on an ONT MinION flowcell. Raw read data was filtered using Filtlong  
360 v0.2.0 (<https://github.com/rrwick/Filtlong>) and assembled with corresponding Illumina data  
361 using Unicycler v0.4.8.<sup>24</sup> Quality control was implemented at several steps in the pipeline using  
362 FastQC v0.11.8,<sup>25</sup> Quast v4.6.3,<sup>26</sup> and MultiQC v1.6.<sup>27</sup> Plasmid comparison was performed using  
363 ANICalculator.<sup>28</sup>

364 1784 genome assemblies marked as ST38 Complex were downloaded from Enterobase and  
365 supplemented with 21 ST38 genomes from this study. Genomes were annotated using prokka  
366 v1.14,<sup>29</sup> a core genome was defined using Roary v3.13.0<sup>22</sup> and 2678 core genes were  
367 subsequently aligned with MAFFT v7.307.<sup>30</sup> IQtree v1.6.6<sup>12</sup> was used to infer the phylogeny  
368 under a general time reversible model with base frequencies estimated from the data and a  
369 FreeRate heterogeneity model with three categories (GTR+F+R3) advised by ModelFinder.<sup>13</sup>

370 Metadata were downloaded from Enterobase and supplemented with metadata available in  
371 NCBI BioSample. Phylogenetic clusters were defined using fastBAPS v1.0.0<sup>31</sup> and AMRfinderplus  
372 v3.2.3<sup>10</sup> was used to detect resistance determinants from the genomes.

373 We provide a Snakemake pipeline in which researchers can estimate the optimal SNP threshold  
374 in their own datasets on the basis of a core genome analysis (<https://github.com/boasvdp/SNP->  
375 [distance-analysis](https://github.com/boasvdp/SNP-distance-analysis)). The funders had no role in study design, collection, analysis, and  
376 interpretation of data; in the writing of the report; or in the decision to submit the paper for  
377 publication.

378

### 379 [Acknowledgements](#)

380 The authors would like to thank Arie van der Ende for the helpful discussions. We thank  
381 SURFsara (<https://www.surfsara.nl>) for the support in using the Lisa Compute Cluster.

### 382 **Funding information**

383 The COMBAT study was funded by Netherlands Organization for Health, Research and  
384 Development (ZonMw; 50-51700-98-120) and EU-H2020 programme (COMPARE, 643476). BCLP  
385 was funded through an internal grant of the Amsterdam UMC (“flexibele OiO beurs”).

### 386 **Declaration of interests**

387 We declare no competing interests.

### 388 **Data and code availability**

389 All Illumina and Oxford Nanopore Technologies sequencing data used in this study are currently  
390 available free of restrictions at NCBI under project accession number PRJEB40103. Metadata  
391 linking isolates to travelers, required to reproduce our analyses, are currently available free of  
392 restrictions at the GitHub repository of this project

393 (<https://www.github.com/boasvdp/COMBAT>, v1.0.0 archived through Zenodo at  
394 <https://doi.org/10.5281/zenodo.4046159>). Other traveler-related metadata will not be made  
395 available due to privacy concerns.

396 All code is available free of restrictions under the MIT license at  
397 <https://www.github.com/boasvdp/COMBAT> (v1.0.0 archived through Zenodo at  
398 <https://doi.org/10.5281/zenodo.4046159>). Researchers can analyze their own data using the  
399 Snakemake pipeline available at <https://github.com/boasvdp/SNP-distance-analysis>.

#### 400 **Ethical statement**

401 The COMBAT study was approved by the Medical Research Ethics Committee, Maastricht  
402 University Medical Centre (METC 12-4-093). All participants provided written informed consent.

403

#### 404 **Appendixes**

405 Figure S1: Accessory gene typing of ST38 isolates.

406 Figure S2: Alignment of plasmids isolated twelve months apart from the same travelers.

407 Figure S3: Phylogroup comparison including accessory genome-typed ST38 isolates.

408 Table S1: Characteristics of long-term and short-term travelers included in this study.

409 Table S2: SNP comparisons between strains with associated metadata (7382 rows).

410 Table S3: Accessory gene typing of ST38 isolates.

411 Table S4: Comparison between different reference genomes in the SNP calling pipeline (1000 rows).

412 Table S5: Alignment metrics for plasmids isolated twelve months apart from the same travelers.

413 Supplemental information: Members of the COMBAT consortium.

414

#### 415 **References**

416 1. Arcilla MS, van Hattem JM, Haverkate MR, et al. Import and spread of extended-spectrum  $\beta$ -  
417 lactamase-producing Enterobacteriaceae by international travellers (COMBAT study): a



- 418 prospective, multicentre cohort study. *Lancet Infect Dis.* 2017;17(1):78-85. doi:10.1016/S1473-  
419 3099(16)30319-X
- 420 2. Ruppé E, Andremont A, Armand-Lefèvre L. Digestive tract colonization by multidrug-resistant  
421 Enterobacteriaceae in travellers: An update. *Travel Med Infect Dis.* 2018;21:28-35.  
422 doi:10.1016/j.tmaid.2017.11.007
- 423 3. Ruppé E, Armand-Lefèvre L, Estellat C, et al. High Rate of Acquisition but Short Duration of Carriage  
424 of Multidrug-Resistant Enterobacteriaceae After Travel to the Tropics. *Clin Infect Dis Off Publ Infect*  
425 *Dis Soc Am.* 2015;61(4):593-600. doi:10.1093/cid/civ333
- 426 4. Paltansing S, Vlot JA, Kraakman MEM, et al. Extended-spectrum  $\beta$ -lactamase-producing  
427 enterobacteriaceae among travelers from the Netherlands. *Emerg Infect Dis.* 2013;19(8):1206-  
428 1213. doi:10.3201/eid.1908.130257
- 429 5. Pires J, Kuenzli E, Kasraian S, et al. Polyclonal Intestinal Colonization with Extended-Spectrum  
430 Cephalosporin-Resistant Enterobacteriaceae upon Traveling to India. *Front Microbiol.* 2016;7:1069.  
431 doi:10.3389/fmicb.2016.01069
- 432 6. Bevan ER, McNally A, Thomas CM, Piddock LJV, Hawkey PM. Acquisition and Loss of CTX-M-  
433 Producing and Non-Producing Escherichia coli in the Fecal Microbiome of Travelers to South Asia.  
434 *mBio.* 2018;9(6). doi:10.1128/mBio.02408-18
- 435 7. Köster J, Rahmann S. Snakemake—a scalable bioinformatics workflow engine. *Bioinformatics.*  
436 2012;28(19):2520-2522. doi:10.1093/bioinformatics/bts480
- 437 8. Chen S, Zhou Y, Chen Y, Gu J. fastp: an ultra-fast all-in-one FASTQ preprocessor. *Bioinformatics.*  
438 2018;34(17):i884-i890. doi:10.1093/bioinformatics/bty560
- 439 9. Bankevich A, Nurk S, Antipov D, et al. SPAdes: A New Genome Assembly Algorithm and Its  
440 Applications to Single-Cell Sequencing. *J Comput Biol.* 2012;19(5):455-477.  
441 doi:10.1089/cmb.2012.0021
- 442 10. Feldgarden M, Brover V, Haft DH, et al. Validating the AMRFinder Tool and Resistance Gene  
443 Database by Using Antimicrobial Resistance Genotype-Phenotype Correlations in a Collection of  
444 Isolates. *Antimicrob Agents Chemother.* 2019;63(11). doi:10.1128/AAC.00483-19
- 445 11. Waters NR, Abram F, Brennan F, Holmes A, Pritchard L. Easy phylotyping of Escherichia coli via the  
446 EzClermont web app and command-line tool. *Access Microbiol.* Published online 2020.  
447 doi:10.1099/acmi.0.000143
- 448 12. Nguyen L-T, Schmidt HA, von Haeseler A, Minh BQ. IQ-TREE: A Fast and Effective Stochastic  
449 Algorithm for Estimating Maximum-Likelihood Phylogenies. *Mol Biol Evol.* 2015;32(1):268-274.  
450 doi:10.1093/molbev/msu300
- 451 13. Kalyaanamoorthy S, Minh BQ, Wong TKF, von Haeseler A, Jermiin LS. ModelFinder: fast model  
452 selection for accurate phylogenetic estimates. *Nat Methods.* 2017;14(6):587-589.  
453 doi:10.1038/nmeth.4285

- 454 14. Page AJ, Taylor B, Delaney AJ, et al. SNP-sites: rapid efficient extraction of SNPs from multi-FASTA  
455 alignments. *Microb Genomics*. 2016;2(4). doi:10.1099/mgen.0.000056
- 456 15. Didelot X, Wilson DJ. ClonalFrameML: Efficient Inference of Recombination in Whole Bacterial  
457 Genomes. *PLOS Comput Biol*. 2015;11(2):e1004041. doi:10.1371/journal.pcbi.1004041
- 458 16. Wickham H. *Ggplot2: Elegant Graphics for Data Analysis*. Springer; 2016.
- 459 17. Arnold JB. ggthemes: Extra Themes, Scales and Geoms for “ggplot2.” *R Package Version*. 2017;3(0).
- 460 18. Pedersen TL. patchwork: The Composer of ggplots. *R Package Version 00*. 2017;1.
- 461 19. Team RC, others. *R: A Language and Environment for Statistical Computing*. Vienna, Austria; 2013.
- 462 20. team T pandas development. *Pandas-Dev/Pandas: Pandas*. Zenodo; 2020.  
463 doi:10.5281/zenodo.3509134
- 464 21. Van Rossum G, Drake FL. *Python 3 Reference Manual*. CreateSpace; 2009.
- 465 22. Page AJ, Cummins CA, Hunt M, et al. Roary: rapid large-scale prokaryote pan genome analysis.  
466 *Bioinformatics*. 2015;31(22):3691-3693. doi:10.1093/bioinformatics/btv421
- 467 23. van der Putten BCL van der, Roodsant TJ, Haagmans MA, Schultsz C, Ark KCH van der. Five  
468 Complete Genome Sequences Spanning the Dutch Streptococcus suis Serotype 2 and Serotype 9  
469 Populations. *Microbiol Resour Announc*. 2020;9(6). doi:10.1128/MRA.01439-19
- 470 24. Wick RR, Judd LM, Gorrie CL, Holt KE. Unicycler: Resolving bacterial genome assemblies from short  
471 and long sequencing reads. *PLOS Comput Biol*. 2017;13(6):e1005595.  
472 doi:10.1371/journal.pcbi.1005595
- 473 25. Andrews S, others. *FastQC: A Quality Control Tool for High Throughput Sequence Data*. Babraham  
474 Bioinformatics, Babraham Institute, Cambridge, United Kingdom; 2010.
- 475 26. Gurevich A, Saveliev V, Vyahhi N, Tesler G. QUAST: quality assessment tool for genome assemblies.  
476 *Bioinformatics*. 2013;29(8):1072-1075. doi:10.1093/bioinformatics/btt086
- 477 27. Ewels P, Magnusson M, Lundin S, Käller M. MultiQC: summarize analysis results for multiple tools  
478 and samples in a single report. *Bioinformatics*. 2016;32(19):3047-3048.  
479 doi:10.1093/bioinformatics/btw354
- 480 28. Varghese NJ, Mukherjee S, Ivanova N, et al. Microbial species delineation using whole genome  
481 sequences. *Nucleic Acids Res*. 2015;43(14):6761-6771. doi:10.1093/nar/gkv657
- 482 29. Seemann T. Prokka: rapid prokaryotic genome annotation. *Bioinformatics*. 2014;30(14):2068-2069.  
483 doi:10.1093/bioinformatics/btu153
- 484 30. Katoh K, Standley DM. MAFFT Multiple Sequence Alignment Software Version 7: Improvements in  
485 Performance and Usability. *Mol Biol Evol*. 2013;30(4):772-780. doi:10.1093/molbev/mst010

- 486 31. Tonkin-Hill G, Lees JA, Bentley SD, Frost SDW, Corander J. Fast hierarchical Bayesian analysis of  
487 population structure. *Nucleic Acids Res.* 2019;47(11):5539-5549. doi:10.1093/nar/gkz361
- 488 32. Baker S, Hanage WP, Holt KE. Navigating the future of bacterial molecular epidemiology. *Curr Opin*  
489 *Microbiol.* 2010;13(5):640-645. doi:10.1016/j.mib.2010.08.002
- 490 33. Jenkins C, Dallman TJ, Launders N, et al. Public Health Investigation of Two Outbreaks of Shiga  
491 Toxin-Producing *Escherichia coli* O157 Associated with Consumption of Watercress. *Appl Environ*  
492 *Microbiol.* 2015;81(12):3946-3952. doi:10.1128/AEM.04188-14
- 493 34. Dallman TJ, Byrne L, Ashton PM, et al. Whole-Genome Sequencing for National Surveillance of  
494 Shiga Toxin-Producing *Escherichia coli* O157. *Clin Infect Dis.* 2015;61(3):305-312.  
495 doi:10.1093/cid/civ318
- 496 35. de Been M, Lanza VF, de Toro M, et al. Dissemination of cephalosporin resistance genes between  
497 *Escherichia coli* strains from farm animals and humans by specific plasmid lineages. *PLoS Genet.*  
498 2014;10(12):e1004776. doi:10.1371/journal.pgen.1004776
- 499 36. Gorrie CL, Mirčeta M, Wick RR, et al. Gastrointestinal Carriage Is a Major Reservoir of *Klebsiella*  
500 *pneumoniae* Infection in Intensive Care Patients. *Clin Infect Dis.* 2017;65(2):208-215.  
501 doi:10.1093/cid/cix270
- 502 37. Bergh MFQK den, Rossen JWA, Bruijning-Verhagen PCJ, et al. Whole-Genome Multilocus Sequence  
503 Typing of Extended-Spectrum-Beta-Lactamase-Producing Enterobacteriaceae. *J Clin Microbiol.*  
504 2016;54(12):2919-2927. doi:10.1128/JCM.01648-16
- 505 38. Birgy A, Madhi F, Jung C, et al. Diversity and trends in population structure of ESBL-producing  
506 Enterobacteriaceae in febrile urinary tract infections in children in France from 2014 to 2017. *J*  
507 *Antimicrob Chemother.* 2020;75(1):96-105. doi:10.1093/jac/dkz423
- 508 39. Campos ACC, Andrade NL, Ferdous M, et al. Comprehensive Molecular Characterization of  
509 *Escherichia coli* Isolates from Urine Samples of Hospitalized Patients in Rio de Janeiro, Brazil. *Front*  
510 *Microbiol.* 2018;9. doi:10.3389/fmicb.2018.00243
- 511 40. Glaize A, Gutierrez-Rodriguez E, Hanning I, et al. Transmission of antimicrobial resistant non-O157  
512 *Escherichia coli* at the interface of animal-fresh produce in sustainable farming environments. *Int J*  
513 *Food Microbiol.* 2020;319:108472. doi:10.1016/j.ijfoodmicro.2019.108472
- 514 41. Harris PNA, Ben Zakour NL, Roberts LW, et al. Whole genome analysis of cephalosporin-resistant  
515 *Escherichia coli* from bloodstream infections in Australia, New Zealand and Singapore: high  
516 prevalence of CMY-2 producers and ST131 carrying blaCTX-M-15 and blaCTX-M-27. *J Antimicrob*  
517 *Chemother.* 2018;73(3):634-642. doi:10.1093/jac/dkx466
- 518 42. Hastak P, Cummins ML, Gottlieb T, et al. Genomic profiling of *Escherichia coli* isolates from  
519 bacteraemia patients: a 3-year cohort study of isolates collected at a Sydney teaching hospital.  
520 *Microb Genomics.* 2020;6(5):e000371. doi:10.1099/mgen.0.000371
- 521 43. Liu CM, Stegger M, Aziz M, et al. *Escherichia coli* ST131-H22 as a Foodborne Uropathogen. *mBio.*  
522 2018;9(4). doi:10.1128/mBio.00470-18

- 523 44. MacFadden DR, Melano RG, Coburn B, Tijet N, Hanage WP, Daneman N. Comparing Patient Risk  
524 Factor-, Sequence Type-, and Resistance Locus Identification-Based Approaches for Predicting  
525 Antibiotic Resistance in Escherichia coli Bloodstream Infections. *J Clin Microbiol.* 2019;57(6).  
526 doi:10.1128/JCM.01780-18
- 527 45. Marsh JW, Mustapha MM, Griffith MP, et al. Evolution of Outbreak-Causing Carbapenem-Resistant  
528 Klebsiella pneumoniae ST258 at a Tertiary Care Hospital over 8 Years. *mBio.* 2019;10(5).  
529 doi:10.1128/mBio.01945-19
- 530 46. Mellmann A, Bletz S, Böking T, et al. Real-Time Genome Sequencing of Resistant Bacteria Provides  
531 Precision Infection Control in an Institutional Setting. *J Clin Microbiol.* 2016;54(12):2874-2881.  
532 doi:10.1128/JCM.00790-16
- 533 47. Mukerji S, Stegger M, Truswell AV, et al. Resistance to critically important antimicrobials in  
534 Australian silver gulls (*Chroicocephalus novaehollandiae*) and evidence of anthropogenic origins. *J*  
535 *Antimicrob Chemother.* 2019;74(9):2566-2574. doi:10.1093/jac/dkz242
- 536 48. Pecora N, Zhao X, Nudel K, et al. Diverse Vectors and Mechanisms Spread New Delhi Metallo- $\beta$ -  
537 Lactamases among Carbapenem-Resistant Enterobacteriaceae in the Greater Boston Area.  
538 *Antimicrob Agents Chemother.* 2019;63(2). doi:10.1128/AAC.02040-18
- 539 49. Peña-Gonzalez A, Soto-Girón MJ, Smith S, et al. Metagenomic Signatures of Gut Infections Caused  
540 by Different Escherichia coli Pathotypes. *Appl Environ Microbiol.* 2019;85(24).  
541 doi:10.1128/AEM.01820-19
- 542 50. Raven KE, Ludden C, Gouliouris T, et al. Genomic surveillance of Escherichia coli in municipal  
543 wastewater treatment plants as an indicator of clinically relevant pathogens and their resistance  
544 genes. *Microb Genomics.* 2019;5(5). doi:10.1099/mgen.0.000267
- 545 51. Roberts LW, Forde BM, Henderson A, et al. Intensive infection control responses and whole  
546 genome sequencing to interrupt and resolve widespread transmission of OXA-181 Escherichia coli  
547 in a hospital setting. *bioRxiv.* Published online November 30, 2019:850628. doi:10.1101/850628
- 548 52. Sütterlin S, Téllez-Castillo CJ, Anselem L, Yin H, Bray JE, Maiden MCJ. Heavy Metal Susceptibility of  
549 Escherichia coli Isolated from Urine Samples from Sweden, Germany, and Spain. *Antimicrob Agents*  
550 *Chemother.* 2018;62(5). doi:10.1128/AAC.00209-18
- 551 53. Syre H, Hetland MAK, Bernhoff E, et al. Microbial risk factors for treatment failure of pivmecillinam  
552 in community-acquired urinary tract infections caused by ESBL-producing Escherichia coli. *APMIS.*  
553 2020;128(3):232-241. doi:10.1111/apm.13013
- 554 54. Thanh Duy P, Thi Nguyen TN, Vu Thuy D, et al. Commensal Escherichia coli are a reservoir for the  
555 transfer of XDR plasmids into epidemic fluoroquinolone-resistant Shigella sonnei. *Nat Microbiol.*  
556 2020;5(2):256-264. doi:10.1038/s41564-019-0645-9
- 557 55. Zhou X, García-Cobos S, Ruijs GJHM, et al. Epidemiology of Extended-Spectrum  $\beta$ -Lactamase-  
558 Producing E. coli and Vancomycin-Resistant Enterococci in the Northern Dutch–German Cross-  
559 Border Region. *Front Microbiol.* 2017;8. doi:10.3389/fmicb.2017.01914

- 560 56. Manges AR, Geum HM, Guo A, Edens TJ, Fibke CD, Pitout JDD. Global Extraintestinal Pathogenic  
561 Escherichia coli (ExPEC) Lineages. *Clin Microbiol Rev.* 2019;32(3). doi:10.1128/CMR.00135-18
- 562 57. Nicolas-Chanoine M-H, Blanco J, Leflon-Guibout V, et al. Intercontinental emergence of Escherichia  
563 coli clone O25:H4-ST131 producing CTX-M-15. *J Antimicrob Chemother.* 2008;61(2):273-281.  
564 doi:10.1093/jac/dkm464
- 565 58. Nicolas-Chanoine M-H, Bertrand X, Madec J-Y. Escherichia coli ST131, an Intriguing Clonal Group.  
566 *Clin Microbiol Rev.* 2014;27(3):543-574. doi:10.1128/CMR.00125-13
- 567 59. McNally A, Kallonen T, Connor C, et al. Diversification of Colonization Factors in a Multidrug-  
568 Resistant Escherichia coli Lineage Evolving under Negative Frequency-Dependent Selection. *mBio.*  
569 2019;10(2). doi:10.1128/mBio.00644-19
- 570 60. Sarkar S, Hutton ML, Vagenas D, et al. Intestinal Colonization Traits of Pandemic Multidrug-  
571 Resistant Escherichia coli ST131. *J Infect Dis.* 2018;218(6):979-990. doi:10.1093/infdis/jiy031
- 572 61. Vimont S, Boyd A, Bleibtreu A, et al. The CTX-M-15-Producing Escherichia coli Clone O25b: H4-  
573 ST131 Has High Intestine Colonization and Urinary Tract Infection Abilities. *PLOS ONE.*  
574 2012;7(9):e46547. doi:10.1371/journal.pone.0046547
- 575 62. Cagnacci S, Gualco L, Debbia E, Schito GC, Marchese A. European Emergence of Ciprofloxacin-  
576 Resistant Escherichia coli Clonal Groups O25:H4-ST 131 and O15:K52:H1 Causing Community-  
577 Acquired Uncomplicated Cystitis. *J Clin Microbiol.* 2008;46(8):2605-2612. doi:10.1128/JCM.00640-  
578 08
- 579 63. Lee MY, Choi HJ, Choi JY, et al. Dissemination of ST131 and ST393 community-onset, ciprofloxacin-  
580 resistant Escherichia coli clones causing urinary tract infections in Korea. *J Infect.* 2010;60(2):146-  
581 153. doi:10.1016/j.jinf.2009.11.004
- 582 64. Woodford N, Turton JF, Livermore DM. Multiresistant Gram-negative bacteria: the role of high-risk  
583 clones in the dissemination of antibiotic resistance. *FEMS Microbiol Rev.* 2011;35(5):736-755.  
584 doi:10.1111/j.1574-6976.2011.00268.x
- 585 65. Zhou Z, Alikhan N-F, Mohamed K, et al. The Enterobase user's guide, with case studies on  
586 Salmonella transmissions, Yersinia pestis phylogeny, and Escherichia core genomic diversity.  
587 *Genome Res.* 2020;30(1):138-152. doi:10.1101/gr.251678.119
- 588 66. Pitout JDD, Peirano G, Kock MM, Strydom K-A, Matsumura Y. The Global Ascendancy of OXA-48-  
589 Type Carbapenemases. *Clin Microbiol Rev.* 2019;33(1). doi:10.1128/CMR.00102-19
- 590 67. van Hattem JM, Arcilla MS, Bootsma MC, et al. Prolonged carriage and potential onward  
591 transmission of carbapenemase-producing Enterobacteriaceae in Dutch travelers. *Future Microbiol.*  
592 2016;11(7):857-864. doi:10.2217/fmb.16.18
- 593 68. Letunic I, Bork P. Interactive tree of life (iTOL) v3: an online tool for the display and annotation of  
594 phylogenetic and other trees. *Nucleic Acids Res.* 2016;44(W1):W242-W245.  
595 doi:10.1093/nar/gkw290
