# Supplementary material for: Extraintestinal pathogenic Escherichia coli (ExPEC) are associated with prolonged carriage of extended-spectrum β-lactamase-producing E. coli acquired during travel
Source: bioRxiv or medRxiv preprint supplement (doi:10.1101/2020.09.23.309856), 2021-10-26
Supplement: Supplementary file [file media-1.pdf]

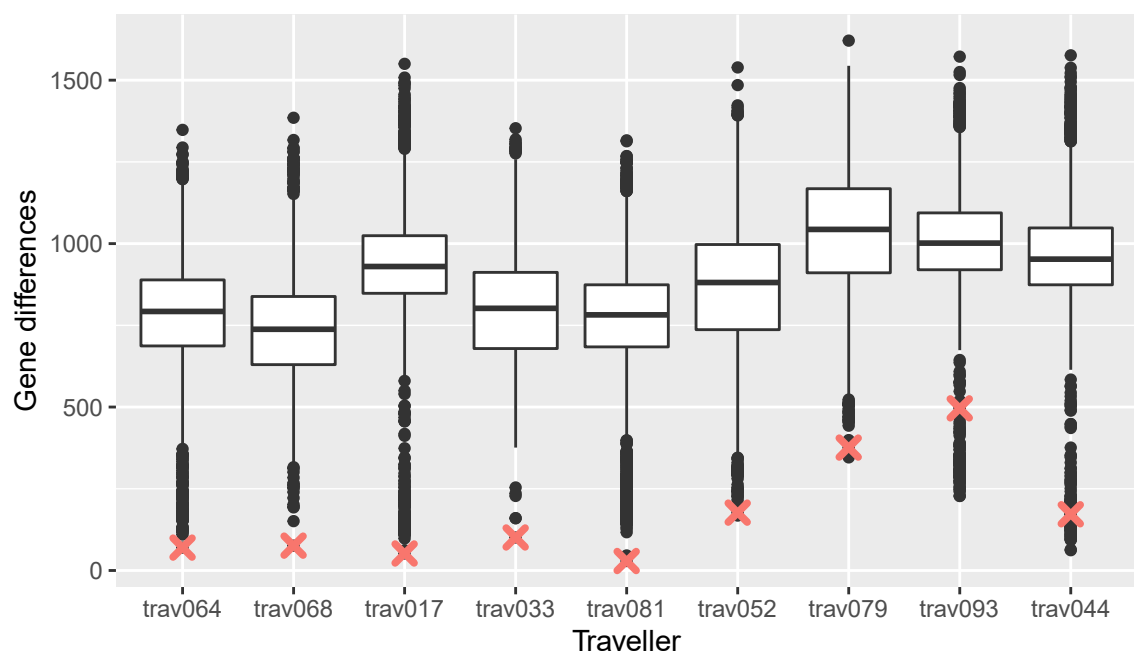

**Figure S1.** Count of differences is gene presence between ST38 isolate(s) of a traveller and all other ST38 isolates (COMBAT study and external databases). Red crosses indicate the closest match of another ST38 isolate isolated from the same traveller, 12 months later. Center line: median; box: interquartile range; whiskers: 1.5x interquartile range; points: outliers.

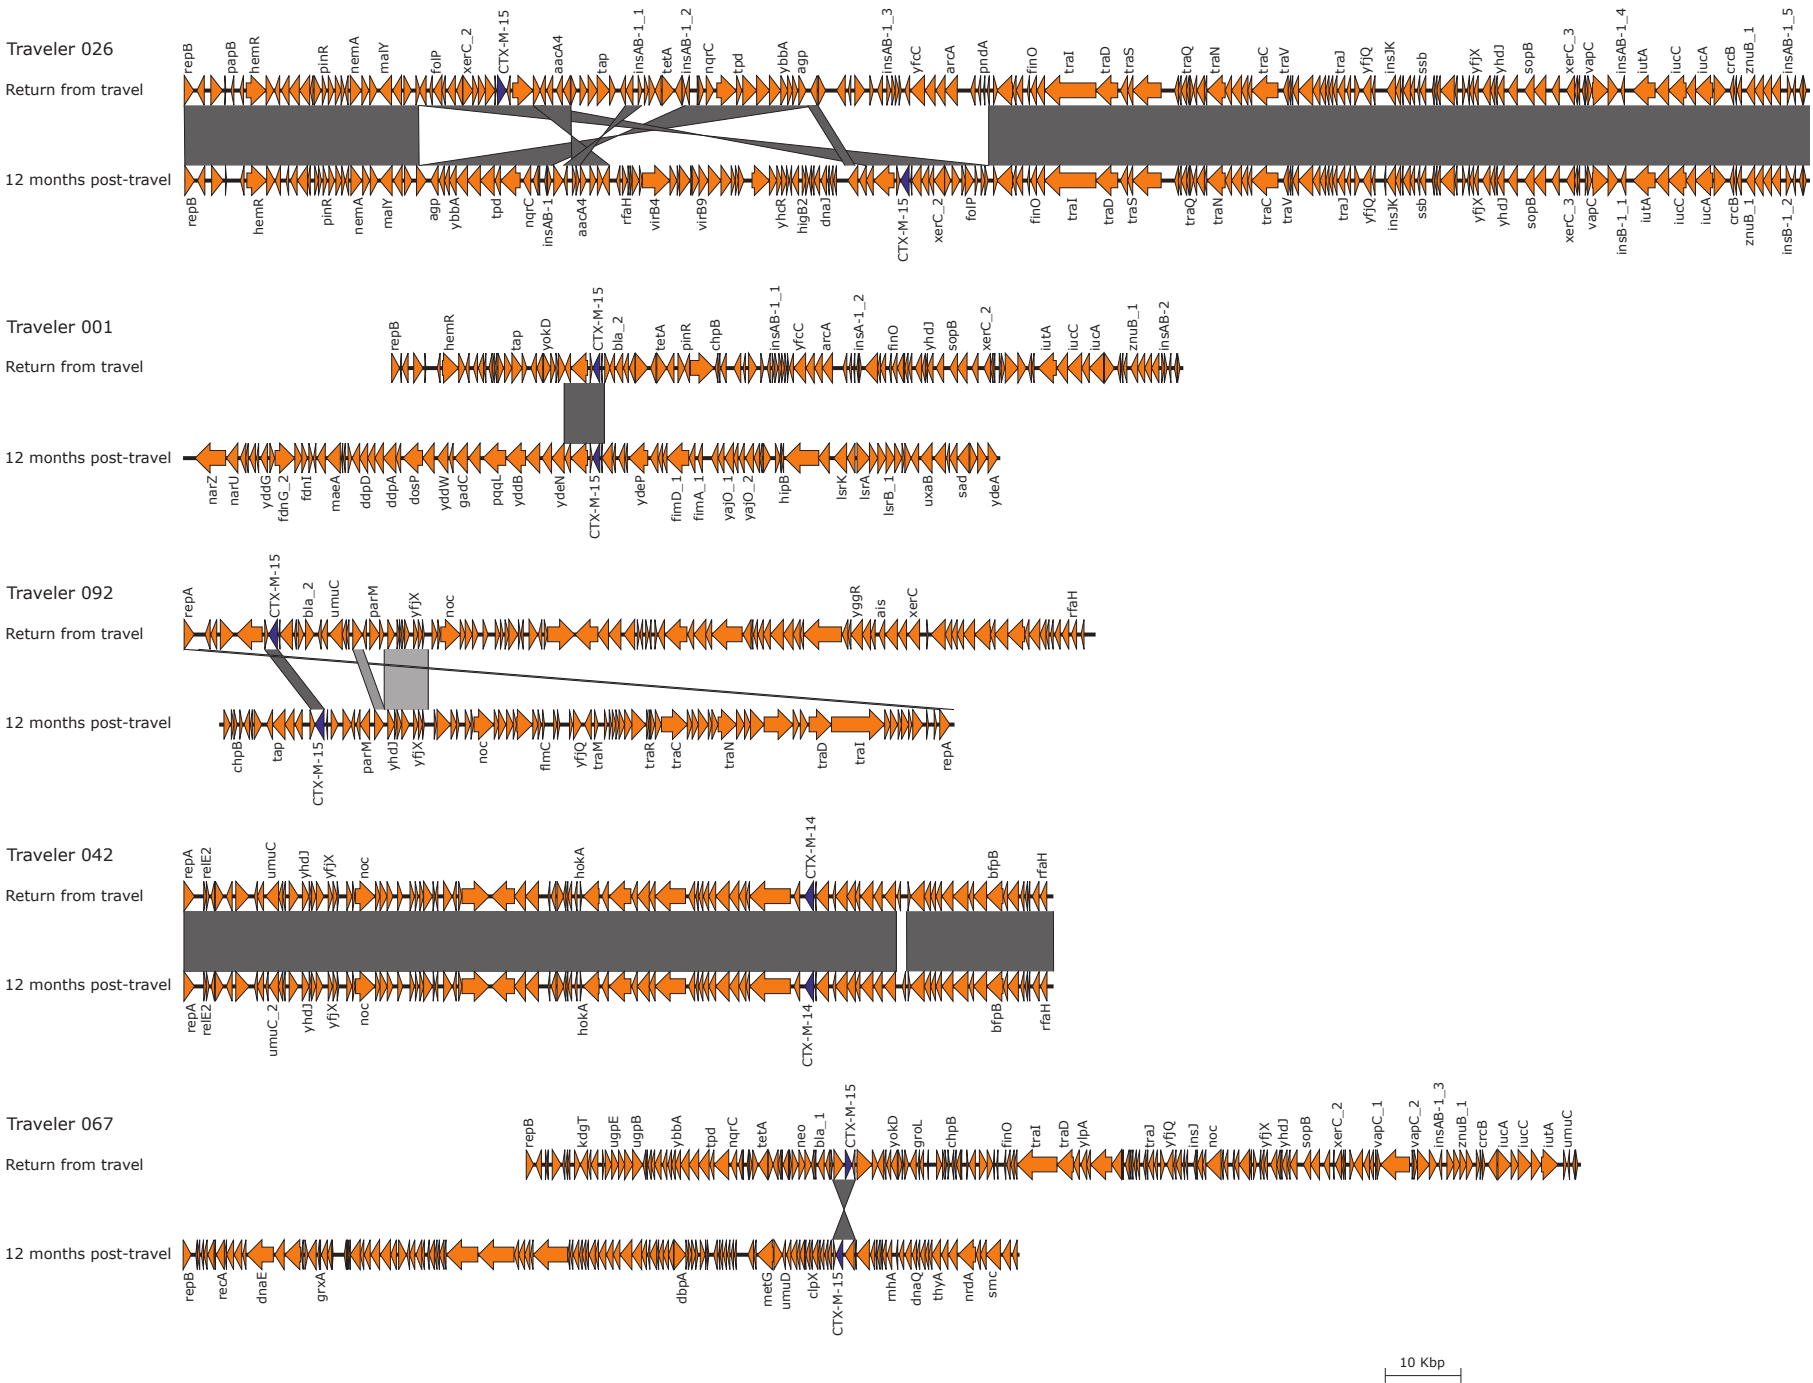

**Figure S2.** Alignment of plasmids isolated twelve months apart from the same traveller. Dark purple arrows indicate the ESBL gene, while orange arrows indicate all other open reading frames. Grey boxes indicate alignable segments between plasmids, with at least 99% identity.

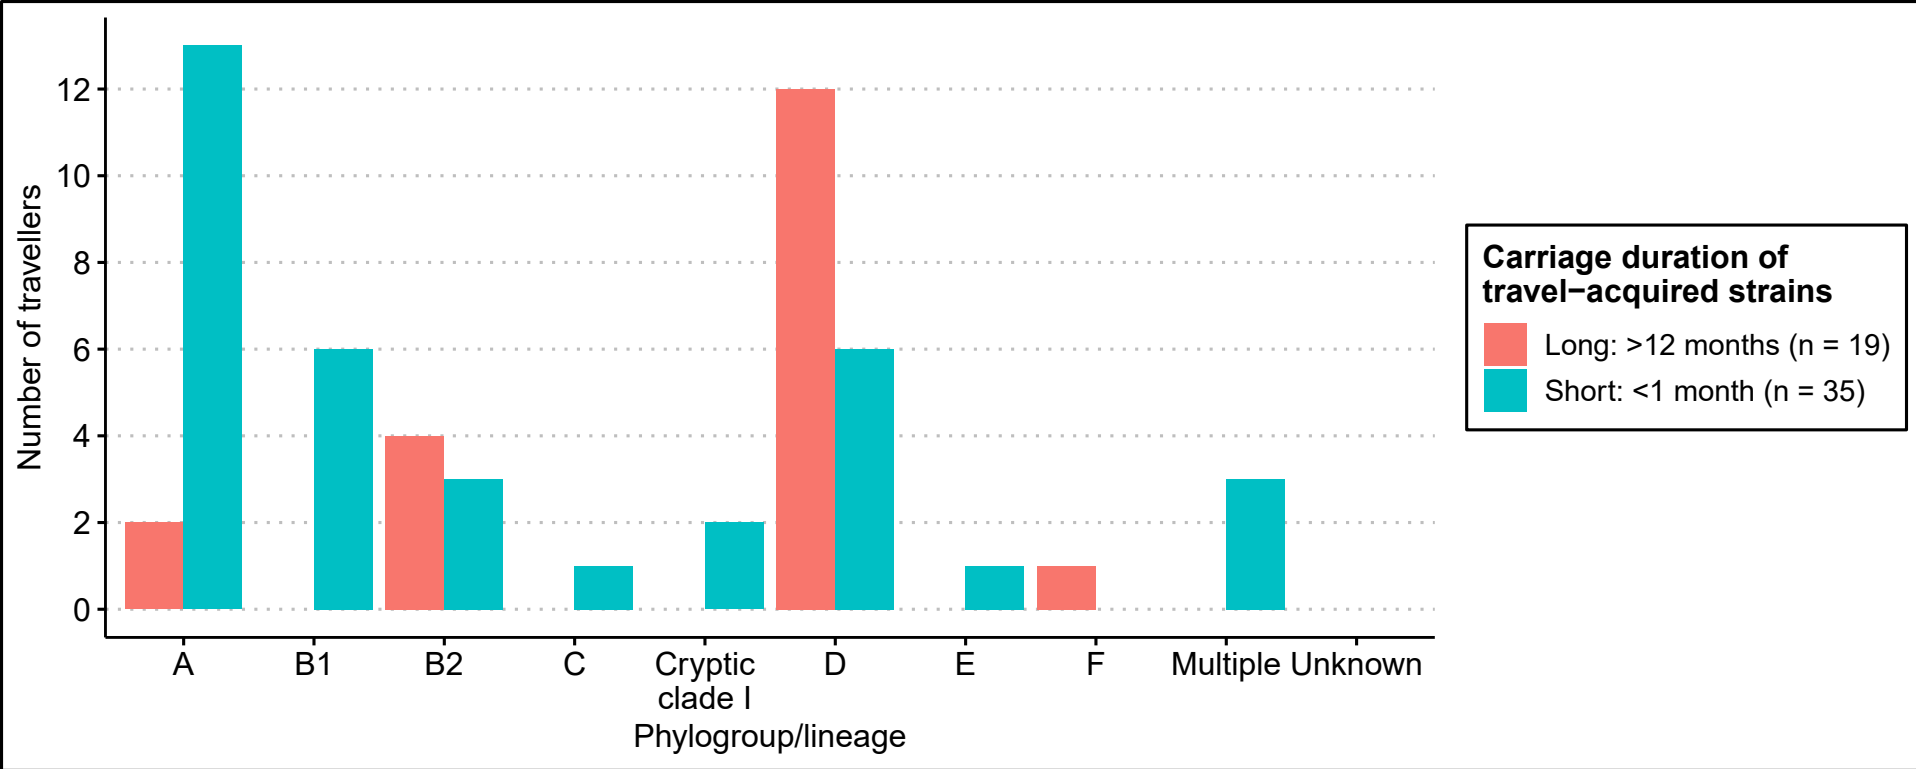

**Figure S3.** Phylogroup comparison, when ST38 isolates are included that could be typed on accessory gene profile.

**Table S1.** Characteristics of long-term and short-term carriers. Matching was performed on sex, age and travel destination. These characteristics are depicted in bold. Data are number (%) for all characteristics except age, which is median (IQR).

|                                                           |                                                                                              | Long-term carriers<br>(n = 28)* | Short-term carriers<br>(n = 54)* |
|-----------------------------------------------------------|----------------------------------------------------------------------------------------------|---------------------------------|----------------------------------|
|                                                           | <b>Male</b>                                                                                  | 10 (35.7%)                      | 19 (35.2%)                       |
|                                                           | <b>Age</b>                                                                                   | 49.1 (37.4-56.5)                | 49.5 (36.0-56.6)                 |
| <b>Continent visited during index travel</b>              | <b>Africa</b>                                                                                | 2 (7.1%)                        | 4 (7.4%)                         |
|                                                           | <b>Asia</b>                                                                                  | 24 (85.7%)                      | 46 (85.2%)                       |
|                                                           | <b>Europe</b>                                                                                | 0 (0%)                          | 0 (0%)                           |
|                                                           | <b>North and South America</b>                                                               | 2 (7.1%)                        | 4 (7.4%)                         |
|                                                           | <b>Oceania</b>                                                                               | 0 (0%)                          | 0 (0%)                           |
|                                                           | Admitted to hospital during index travel                                                     | 0 (0%)                          | 0 (0%)                           |
| Travel outside Netherlands after return from index travel | Within 1 month after return from index travel                                                | 5 (18.5%)                       | 7 (14.3%)                        |
|                                                           | Travel to same country as index travel, within 1 month after return from index travel        | 1 (3.7%)                        | 0 (0%)                           |
|                                                           | Within 1 to 3 months after return from index travel                                          | 8 (29.6%)                       | 16 (34.0%)                       |
|                                                           | Travel to same country as index travel, within 1 to 3 months after return from index travel  | 0 (0%)                          | 1 (2.1%)                         |
|                                                           | Within 3 to 6 months after return from index travel                                          | 13 (48.1%)                      | 22 (46.8%)                       |
|                                                           | Travel to same country as index travel, within 3 to 6 months after return from index travel  | 0 (0%)                          | 1 (2.1%)                         |
|                                                           | Within 6 to 12 months after return from index travel                                         | 17 (65.4%)                      | 30 (69.8%)                       |
|                                                           | Travel to same country as index travel, within 6 to 12 months after return from index travel | 1 (3.7%)                        | 1 (2.3%)                         |
| Antibiotic usage                                          | Within 3 months before index travel                                                          | 2 (7.1%)                        | 2 (3.7%)                         |
|                                                           | During index travel                                                                          | 4 (14.3%)                       | 4 (7.4%)                         |
|                                                           | Within 1 month after return from index travel                                                | 1 (3.6%)                        | 2 (4.1%)                         |
|                                                           | Within 1 to 3 months after return from index travel                                          | 2 (7.1%)                        | 2 (4.0%)                         |
|                                                           | Within 3 to 6 months after return from index travel                                          | 0 (0%)                          | 3 (6.1%)                         |
|                                                           | Within 6 to 12 months after return from index travel                                         | 4 (14.3%)                       | 4 (8.5%)                         |

\*Percentages are calculated with missing data excluded, which causes that denominators may vary between characteristics.

**Table S3.** Accessory gene typing for ST38 isolates from nine travellers. For five out of nine travellers, the closest match was within the same traveller and not with any public isolate.

| Isolate<br>(t = 0 months after return) | Isolate<br>(t = 12 months after return) | Differences between<br>isolates | Differences with closest isolate<br>(COMBAT & Enterobase) | Closest match<br>within traveller? |
|----------------------------------------|-----------------------------------------|---------------------------------|-----------------------------------------------------------|------------------------------------|
| COMB1136                               | COMB2701                                | 76                              | 76                                                        | Yes                                |
| COMB1457                               | COMB2709                                | 52                              | 52                                                        | Yes                                |
| COMB2056                               | COMB2770                                | 172                             | 62                                                        | No                                 |
| COMB0880                               | COMB2629                                | 496                             | 228                                                       | No                                 |
| COMB2023/COMB2024                      | COMB2780                                | 29                              | 29                                                        | Yes                                |
| COMB0758                               | COMB2678                                | 70                              | 70                                                        | Yes                                |
| COMB1965                               | COMB2767                                | 101                             | 101                                                       | Yes                                |
| COMB0857                               | COMB2685                                | 376                             | 346                                                       | No                                 |
| COMB0549                               | COMB2589                                | 177                             | 168                                                       | No                                 |

**Table S5.** Alignment metrics for plasmids from strains isolated at return from travel (T1) or 12 months after return from travel (T5). ANI = average nucleotide identity, AF = alignment fraction.

| Traveler | T1 -> T5 |      | T5 -> T1 |      | Persistent plasmid? |
|----------|----------|------|----------|------|---------------------|
|          | ANI      | AF   | ANI      | AF   |                     |
| trav026  | 99.98    | 0.84 | 99.98    | 0.79 | Yes                 |
| trav001  | 100.00   | 0.07 | 100.00   | 0.05 | No                  |
| trav092  | 92.39    | 0.12 | 92.39    | 0.15 | No                  |
| trav042  | 99.80    | 0.99 | 99.80    | 1.00 | Yes                 |
| trav067  | 99.92    | 0.02 | 99.92    | 0.03 | No                  |
